# Supplementary material
Source: PubMed Central journal article supplement (PMC7783328)
Supplement: AEM.02233-20-s0001.pdf [file AEM.02233-20-s0001.pdf]

1 **SUPPLEMENTAL MATERIAL FOR:**

2

3 **Microbiome variability across the native and invasive range of the ascidian *Clavelina***  
4 ***oblonga***

5

6 Millie Goddard-Dwyer<sup>1,2</sup>, Susanna López-Legentil<sup>1</sup>, Patrick M. Erwin<sup>1\*</sup>

7

8 <sup>1</sup>*Department of Biology & Marine Biology, and Center for Marine Science, University of North*  
9 *Carolina Wilmington, 5600 Marvin K. Moss Lane, Wilmington NC 28409, United States of*  
10 *America*

11 <sup>2</sup>*University of Southampton, European Way, Southampton SO14 3ZH, United Kingdom*

12

13 Running Title: Microbiome variability in an invasive ascidian

14

15 \*Corresponding author: Patrick M. Erwin; email: [erwinp@uncw.edu](mailto:erwinp@uncw.edu); Telephone: +1(910) 962-  
16 2326; Fax: +1 (910) 962-2410

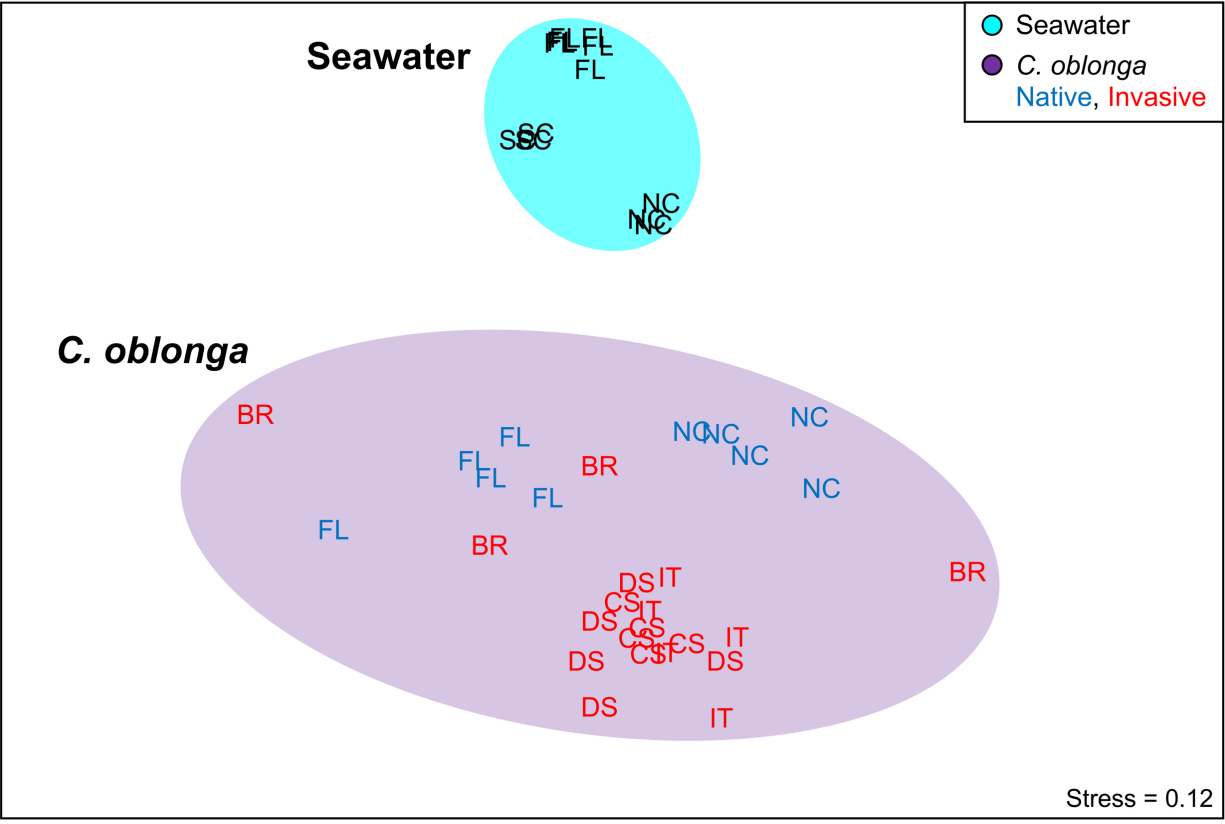

17

18 **Figure S1.** Non-metric multi-dimensional scaling (nMDS) plot visualizing the similarity of

19 microbial communities in *Clavelina oblonga* (purple oval) and ambient seawater (blue oval).

20 Letters denote different collection locations: Florida (FL), North Carolina (NC), South Carolina

21 (SC), Brazil (BR), Ebro Delta, Spain (DS), Cadis, Spain (CS) and Italy (IT). Colored letters

22 indicate *C. oblonga* colonies from invasive (red) and native (blue) locations.

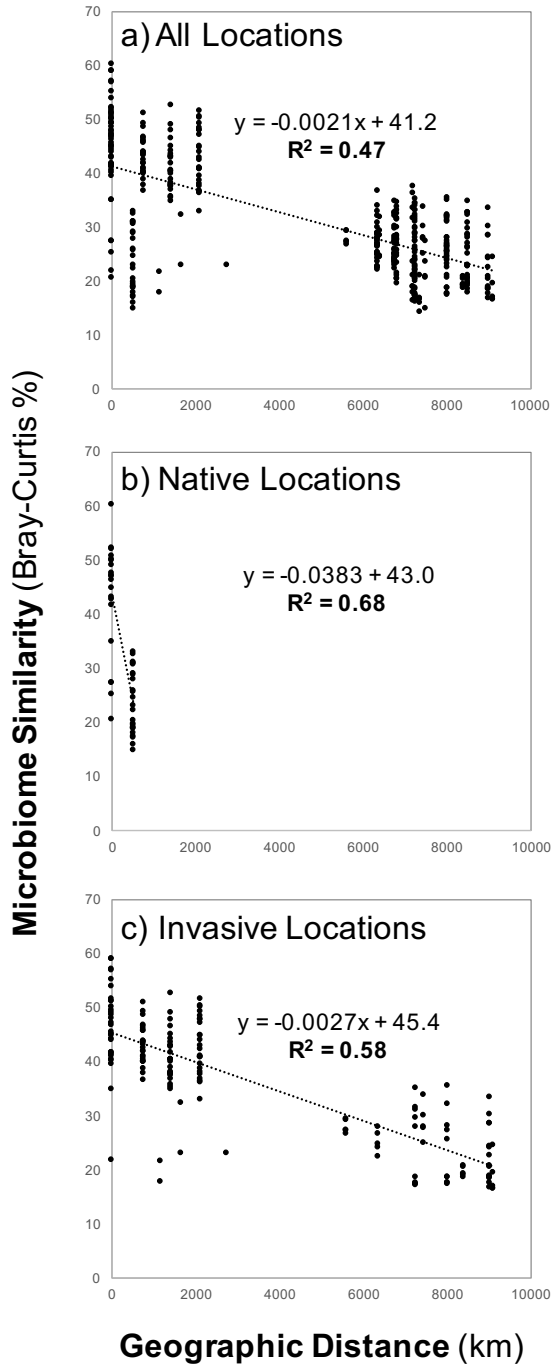

23

24 **Figure S2.** Distance-decay relationships in the microbiome of *Clavelina oblonga* across native  
 25 and invasive locations.

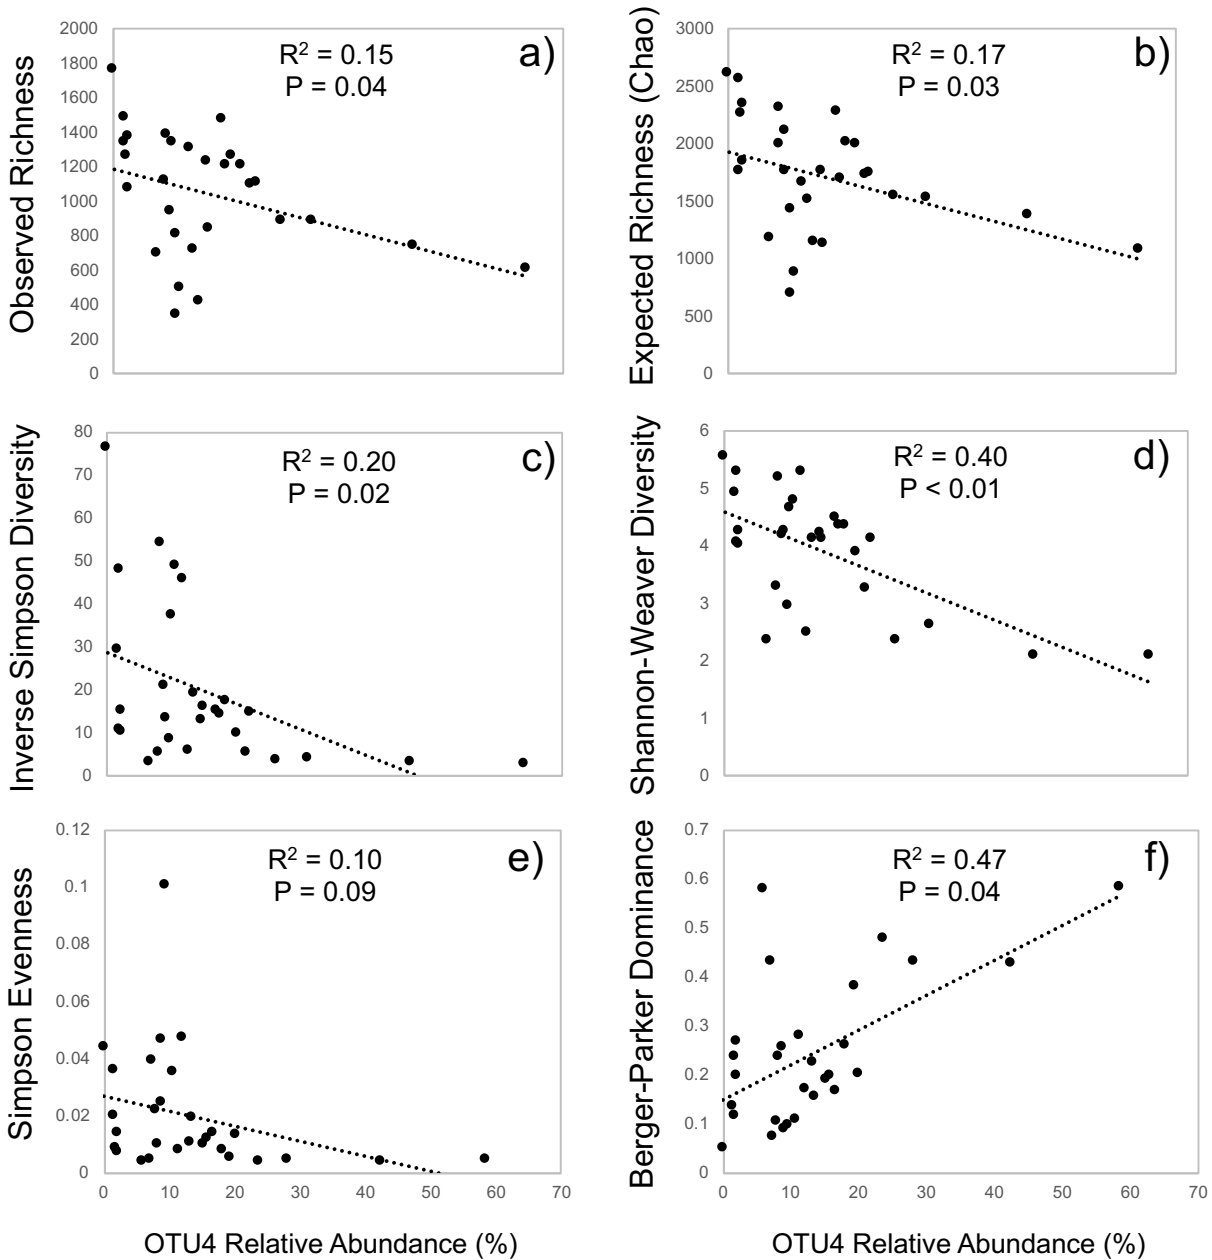

26

27 **Figure S3.** Correlations between the relative abundance of symbiont OTU4 (*Saprospirales* sp.)

28 and microbiome diversity metrics (a) observed richness, (b) expected (Chao) richness, (c)

29 Inverse Simpson diversity, (d) Shannon-Weaver diversity, (e) Simpson evenness and (f) Berger-

30 Parker dominance.

31 **Table S1.** Composition of microbial communities in *Clavelina oblonga* (within native and  
 32 invasive ranges) and seawater (collected in native range). Asterisks (\*) denote significant  
 33 differences among sites within ranges.

34

| <b>Taxon</b>          | <b>Invasive<br/>(%, ±SE)</b> | <b>Native<br/>(%, ±SE)</b> | <b>Seawater<br/>(%, ±SE)</b> | <b>Invasive vs. Native<br/>(P-value)</b> | <b><i>C. oblonga</i> vs. Seawater<br/>(P-value)</b> |
|-----------------------|------------------------------|----------------------------|------------------------------|------------------------------------------|-----------------------------------------------------|
| Acidobacteria         | 0.24 ±0.05                   | 1.17 ±0.69                 | 0.25 ±0.07                   | 0.002*                                   | 0.182                                               |
| Actinobacteria        | 1.16 ±0.22                   | 3.75 ±1.14                 | 8.99 ±0.54                   | 0.006*                                   | <0.001*                                             |
| Bacteroidetes         | 21.91 ±2.97                  | 12.68 ±2.11                | 11.38 ±0.43                  | 0.037*                                   | 0.017*                                              |
| Crenarchaeota         | 0.56 ±0.37                   | 2.24 ±1.21                 | 0.11 ±0.03                   | 0.582                                    | 0.091                                               |
| Cyanobacteria         | 1.94 ±0.83                   | 0.76 ±0.26                 | 1.85 ±0.17                   | 0.836                                    | 0.011*                                              |
| OD1                   | 1.04 ±0.55                   | 0.16 ±0.09                 | 0.00 ±0.00                   | 0.051                                    | <0.001*                                             |
| Planctomycetes        | 2.82 ±0.79                   | 2.75 ±0.69                 | 1.71 ±0.35                   | 0.663                                    | 0.673                                               |
| Verrucomicrobia       | 1.58 ±0.64                   | 2.23 ±1.08                 | 1.71 ±0.41                   | 0.335                                    | 0.301                                               |
| Alphaproteobacteria   | 26.78 ±2.91                  | 34.65 ±3.99                | 48.34 ±1.95                  | 0.123                                    | <0.001*                                             |
| Deltaproteobacteria   | 17.67 ±4.03                  | 9.57 ±5.45                 | 1.71 ±0.29                   | 0.162                                    | <0.001*                                             |
| Epsilonproteobacteria | 3.04 ±1.67                   | 7.11 ±2.78                 | 0.17 ±0.04                   | 0.731                                    | 0.040*                                              |
| Gammaproteobacteria   | 18.29 ±1.93                  | 19.4 ±1.31                 | 13.67 ±0.66                  | 0.261                                    | 0.006*                                              |
| Other                 | 3.00 ±0.59                   | 3.54 ±0.97                 | 10.12 ±0.63                  | 0.598                                    | <0.001*                                             |

35

36 **Table S2.** Composition of microbial communities in *Clavelina oblonga* across locations with  
 37 native and invasive ranges. Asterisks (\*) denote significant differences among sites within  
 38 ranges.

39

| <b>Taxon</b>          | <b>Brazil</b><br>(%, ±SE) | <b>Cadis,<br/>Spain</b><br>(%, ±SE) | <b>Ebro Delta,<br/>Spain</b><br>(%, ±SE) | <b>Florida</b><br>(%, ±SE) | <b>Italy</b><br>(%, ±SE) | <b>North<br/>Carolina</b><br>(%, ±SE) | <b>P-value</b> | <b>Pairwise Comparisons</b> |
|-----------------------|---------------------------|-------------------------------------|------------------------------------------|----------------------------|--------------------------|---------------------------------------|----------------|-----------------------------|
| Acidobacteria         | 0.35 ±0.16                | 0.17 ±0.02                          | 0.23 ±0.09                               | 0.33 ±0.05                 | 0.22 ±0.09               | 2.02 ±1.33                            | 0.470          |                             |
| Actinobacteria        | 1.01 ±0.36                | 0.19 ±0.28                          | 1.19 ±0.47                               | 2.53 ±0.9                  | 1.22 ±0.64               | 4.96 ±2.07                            | 0.138          |                             |
| Bacteroidetes         | 18.4 ±3.36                | 22.31 ±2.49                         | 14.39 ±2.12                              | 18.03 ±2.03                | 31.83 ±9.58              | 7.32 ±1.25                            | 0.029*         | IT > NC                     |
| Crenarchaeota         | 0.29 ±0.05                | 0.19 ±0.08                          | 0.18 ±0.15                               | 4.42 ±2.04                 | 1.52 ±1.4                | 0.06 ±0.02                            | 0.025*         | FL > NC                     |
| Cyanobacteria         | 0.98 ±0.87                | 1.84 ±1.45                          | 4.63 ±2.52                               | 0.91 ±0.46                 | 0.12 ±0.02               | 0.62 ±0.3                             | 0.122          |                             |
| OD1                   | 0.14 ±0.08                | 0.58 ±0.29                          | 3.15 ±1.9                                | 0.3 ±0.17                  | 0.11 ±0.04               | 0.03 ±0.01                            | 0.036*         |                             |
| Planctomycetes        | 4.36 ±3.58                | 2.04 ±0.66                          | 3.46 ±1.05                               | 3.26 ±0.81                 | 1.7 ±0.71                | 2.24 ±1.16                            | 0.712          |                             |
| Verrucomicrobia       | 4.7 ±2.71                 | 0.47 ±0.15                          | 0.77 ±0.18                               | 3.83 ±1.99                 | 1 ±0.36                  | 0.64 ±0.22                            | 0.067          |                             |
| Alphaproteobacteria   | 29.1 ±4.55                | 13.53 ±2.55                         | 37.71 ±3.79                              | 39.03 ±3.9                 | 27.24 ±6.07              | 30.27 ±6.83                           | 0.024*         | FL > CS, DS > CS            |
| Deltaproteobacteria   | 10.57 ±4.21               | 39.83 ±4.88                         | 7.58 ±2.63                               | 4 ±0.62                    | 11.26 ±8.21              | 15.13 ±10.85                          | 0.228          |                             |
| Epsilonproteobacteria | 5.71 ±3.87                | 0.15 ±0.01                          | 0.16 ±0.02                               | 0.05 ±0.02                 | 6.66 ±5.47               | 14.16 ±3.13                           | 0.002*         | NC > FL, IT > FL            |
| Gammaproteobacteria   | 21.94 ±6.23               | 15.22 ±0.83                         | 21.84 ±3.64                              | 20.15 ±1.43                | 14.89 ±3.93              | 18.65 ±2.33                           | 0.528          |                             |
| Other                 | 2.46 ±1.16                | 2.47 ±0.48                          | 4.71 ±1.92                               | 3.16 ±0.93                 | 2.23 ±0.48               | 3.92 ±1.81                            | 0.782          |                             |

40

41 **Table S3.** Analyses of variance (ANOVA) results comparing diversity indices of symbiont  
 42 communities in *Clavelina oblonga* within native and invasive ranges. Asterisks (\*) denote  
 43 significant differences among sites within ranges.

44

| <b>Range</b> | <b>Diversity index</b>  | <b>d.f.</b> | <b>F-ratio</b> | <b>p</b> |
|--------------|-------------------------|-------------|----------------|----------|
| Native       | Observed richness       | 1, 8        | 0.238          | 0.638    |
|              | Expected richness, Chao | 1, 8        | 1.345          | 0.280    |
|              | Simpson evenness        | 1, 8        | 3.029          | 0.120    |
|              | Berger Parker           | 1, 8        | 1.297          | 0.288    |
|              | Inverse Simpson         | 1, 8        | 0.370          | 0.560    |
|              | Shannon-Weaver          | 1, 8        | 1.104          | 0.324    |
| Invasive     | Observed richness       | 3, 15       | 1.535          | 0.246    |
|              | Expected richness, Chao | 3, 15       | 3.295          | 0.050*   |
|              | Simpson evenness        | 3, 15       | 2.396          | 0.109    |
|              | Berger Parker           | 3, 15       | 3.737          | 0.035*   |
|              | Inverse Simpson         | 3, 15       | 1.981          | 0.160    |
|              | Shannon-Weaver          | 3, 15       | 1.257          | 0.324    |

45

46

47 **Table S4.** Symbiont OTUs that contributed to 23% of the dissimilarity between symbiotic  
 48 communities in *Clavelina oblonga* and ambient seawater (SIMPER analysis), showing phylum  
 49 and lowest level taxonomy and characteristic traits (grey boxes denote OTUs with taxonomic  
 50 resolution too low to assign functionality). Average relative abundance of each OTU in *C.*  
 51 *oblonga* (CO) and ambient seawater (SW) is shown, with asterisks (\*) signifying significant  
 52 differences between ranges ( $P < 0.05$ , Metastats). BLAST matches include the source and  
 53 pairwise identity (%) of the closest known relative for each OTU, with crosses (†) indicating that  
 54 the BLAST result is an example chosen from a list of equally matched pairwise identity  
 55 sequences.  
 56

| OTU | Phylum<br>(lowest taxonomy)                     | Characteristic Traits                                                 | Average Rel. Abundance |      |        | %<br>Contrib. | BLAST match                                    |       |
|-----|-------------------------------------------------|-----------------------------------------------------------------------|------------------------|------|--------|---------------|------------------------------------------------|-------|
|     |                                                 |                                                                       | CO                     | SW   | P      |               | Source (acc. no.)                              | % ID  |
| 3   | Proteobacteria<br>(c. $\delta$ -proteobacteria) |                                                                       | 12.0                   | 0.04 | 0.001* | 6.28          | Chiton gill tissue<br>(HE663396)               | 91.2  |
| 4   | Bacteroidetes<br>(o. Saprospirales)             |                                                                       | 13.5                   | 0.04 | 0.001* | 7.09          | Pu-erh tea<br>(KT360474)                       | 91.2  |
| 2   | Proteobacteria<br>( <i>Rhodobacteraceae</i> )   | Chemoheterotroph,<br>hydrolyses urea (49)                             | 9.48                   | 0.39 | 0.001* | 4.88          | Culture<br>(NR114028)                          | 98.8  |
| 8   | Proteobacteria<br>( <i>Arcobacter</i> sp.)      | Chemoheterotroph, reduces<br>nitrate (52)                             | 2.00                   | 0.06 | 0.101  | 1.06          | Marine sediment<br>(JX391310)                  | 100.0 |
| 6   | Crenarchaeota<br>(g. <i>Nitrosopumilus</i> )    | Oxidise $\text{NH}_4^+$ and vitamin<br>$\text{B}_{12}$ synthesis (51) | 1.08                   | 0.08 | 0.009* | 0.55          | Seawater<br>(KX950758) †                       | 100.0 |
| 11  | Proteobacteria<br>( <i>Vibrio shiloi</i> )      | Heavy metal resistance (50),<br>coral pathogen (54)                   | 1.14                   | 0.13 | 0.009* | 0.58          | <i>Doclea</i> sp. host<br>(MG077075)           | 100.0 |
| 15  | Proteobacteria<br>(f. Endozoicimonaceae)        |                                                                       | 1.47                   | 0.12 | 0.002* | 0.75          | <i>Styela clava</i> host<br>(KU648381)         | 99.6  |
| 51  | Proteobacteria<br>(f. <i>Rhodobacteraceae</i> ) |                                                                       | 0.82                   | 0.01 | 0.001* | 0.43          | Seawater<br>(NR132291)                         | 100.0 |
| 24  | Proteobacteria<br>(c. $\delta$ -proteobacteria) |                                                                       | 1.20                   | 0.00 | 0.001* | 0.63          | Subseafloor sediment<br>(JQ989870)             | 90.8  |
| 25  | Proteobacteria<br>(c. $\gamma$ -proteobacteria) |                                                                       | 1.08                   | 0.01 | 0.001* | 0.56          | <i>Galaxea fascicularis</i><br>host (KU353970) | 95.2  |
| 35  | Proteobacteria<br>( <i>Arcobacter</i> sp.)      | Chemoheterotroph, reduces<br>nitrate (52)                             | 0.97                   | 0.00 | 0.002* | 0.51          | Seawater<br>(KX179260) †                       | 100.0 |

57



58 **Table S5.** Collection location, GPS coordinates and sample codes for *Clavelina oblonga* and  
 59 seawater samples used in this study.

60

| <b>Source</b>                          | <b>Location</b>                                    | <b>Coordinates</b>              | <b>Sample Code</b>                                |
|----------------------------------------|----------------------------------------------------|---------------------------------|---------------------------------------------------|
| <i>Clavelina oblonga</i>               | Beaufort, NC USA<br>(July 2014)                    | 34°42'55.1"N,<br>76°40'44.4"W   | CO.1T, CO.2T,<br>CO.3T, CO.4T,<br>CO.5T           |
|                                        | Fernandina Beach, FL USA<br>(Mar 2017)             | 30°40'11.5"N,<br>81°27'59.8"W   | HS34.44, HS34.45,<br>HS34.46, HS34.47,<br>HS34.48 |
|                                        | Cadiz, Spain<br>(Autumn 2014)                      | 36°30'59"N,<br>6°18'41"W        | COC.1, COC.2,<br>COC.3, COC.4,<br>COC.5           |
|                                        | Ebro Delta, Spain<br>(2011-2012)                   | 40°37'01"N,<br>0°37'26" E       | COD.1, COD.2,<br>COD.3, COD.4,<br>COD.5           |
|                                        | Taranto, Italy<br>(2013)                           | 40°28'36"N,<br>17°15'5" E       | COT.1, COT.2,<br>COT.3, COT.4,<br>COT.5           |
|                                        | Pier Baia Golfinhos, Brazil<br>(Sep 2016)          | 27°24'16.97"S,<br>48°33'41.70"W | HS34.04                                           |
|                                        | Pier Florianópolis, Brazil<br>(Sep 2016)           | 27°35'11.75"S,<br>48°33'26.12"W | HS34.05                                           |
|                                        | Pier Enseada Suá, Vitória,<br>Brazil<br>(May 2016) | 20°19'07"S,<br>40°17'56"W       | HS34.06, HS34.07                                  |
|                                        | Seawater                                           | Wrightsville Beach, NC USA      | 34°13'01.6"N,<br>77°48'47.4"W                     |
| Fernandina Beach, FL USA<br>(Mar 2017) |                                                    | 30°40'11.5"N,<br>81°27'59.8"W   | HS34.14, HS34.15,<br>HS34.16                      |
| Smyrna Beach, FL USA<br>(Mar 2017)     |                                                    | 29°01'40.8"N,<br>80°55'14.1"W   | HS34.26, HS34.27,<br>HS34.28                      |
| Sunset Cay, SC USA<br>(Mar 2017)       |                                                    | 32°38'53.8"N,<br>79°57'42.3"W   | HS34.08, HS34.09,<br>HS34.10                      |

61
